# Supplementary material for: Perceived Masculinity Predicts U.S. Supreme Court Outcomes
Source: PubMed Central journal article supplement (PMC5063312; doi:10.1371/journal.pone.0164324), 2016-10-13
Supplement: pone.0164324.s005.pdf [file pone.0164324.s005.pdf]

**S1 Table. Participant Ratings Consistency (N = 748).** This table presents descriptive statistics of a measure of consistency in participant ratings using data on the random set of 6 audio clips that were duplicated for each participant. For each participant, the consistency measure is defined as the average absolute difference in ratings of a given attribute between the duplicate clips :  $abs(rating_{itw} - rating'_{itw})/2$ .

|             | Mean     | 10th Percentile | 25th Percentile | Median   | 75th Percentile | 90th Percentile |
|-------------|----------|-----------------|-----------------|----------|-----------------|-----------------|
| Aggressive  | 1.053922 | .3333333        | .6666667        | 1        | 1.333333        | 1.833333        |
| Attractive  | .8805704 | .1666667        | .5              | .8333333 | 1.166667        | 1.5             |
| Confident   | 1.096702 | .5              | .6666667        | 1        | 1.333333        | 1.833333        |
| Intelligent | .8573975 | .1666667        | .5              | .8333333 | 1.166667        | 1.5             |
| Masculine   | .9193405 | .3333333        | .5              | .8333333 | 1.166667        | 1.666667        |
| Trust       | .9021836 | .1666667        | .5              | .8333333 | 1.166667        | 1.666667        |
| Win         | .9146613 | .3333333        | .5              | .8333333 | 1.166667        | 1.666667        |
