# Supplementary material for: Perceived Masculinity Predicts U.S. Supreme Court Outcomes
Source: PubMed Central journal article supplement (PMC5063312; doi:10.1371/journal.pone.0164324), 2016-10-13
Supplement: pone.0164324.s006.pdf [file pone.0164324.s006.pdf]

**S2 Table. Robustness Checks on Sample of 60 Clips.** This table presents coefficient estimates from OLS regressions using data on a select sample of Supreme Court oral arguments made by male advocates. The dependent variable is an indicator for whether the advocate won the case or not. Independent variables are voice-based ratings of advocate attributes normalized by survey participant. Column 1 reports baseline regression results, column 2 reports results from a specification that includes lawyer biographical controls: age, number of clerkships, and dummies for whether the advocate attended an elite law school, has a second graduate degree, served on law review or as a Supreme Court clerk. Columns 3-4 compare regression results using alternative survey designs to the baseline results presented in column 1. Column 3 presents results from a survey of approximately 200 participants rating the set of 60 audio clips, and column 4 presents results using ratings obtained from a survey that randomly assigned only one attribute to each audio clip. <sup>a</sup> ratings of educatedness were included instead of aggressiveness in columns 3-4; <sup>b</sup> ratings of age were included instead of intelligence in column 4; †, \*, and \*\* indicate significance at the 10 percent, 5 percent, and 1 percent levels, respectively.

| Dependent Variable: Case Outcome (= 1 if advocate won; = 0 if advocate lost) |                                  |                           |                        |                                  |
|------------------------------------------------------------------------------|----------------------------------|---------------------------|------------------------|----------------------------------|
|                                                                              | Baseline<br>(1)                  | Advocate Biography<br>(2) | Tenfold Ratings<br>(3) | Single Attribute<br>(4)          |
| Aggressive <sup>a</sup>                                                      | 0.0171<br>(0.0224)               | 0.0254<br>(0.0200)        |                        |                                  |
| Attractive                                                                   | 0.00950<br>(0.0230)              | 0.00544<br>(0.0193)       | -0.0142<br>(0.0216)    | -0.0208<br>(0.0219)              |
| Confident                                                                    | 0.00376<br>(0.0239)              | 0.00575<br>(0.0190)       | 0.0254<br>(0.0263)     | -0.0132<br>(0.0238)              |
| Intelligent <sup>b</sup>                                                     | 0.0274<br>(0.0194)               | 0.0242<br>(0.0154)        | 0.00463<br>(0.00896)   |                                  |
| Masculine                                                                    | -0.0567 <sup>†</sup><br>(0.0310) | -0.0644*<br>(0.0263)      | -0.0982*<br>(0.0381)   | -0.0541 <sup>†</sup><br>(0.0297) |
| Trustworthy                                                                  | 0.0205<br>(0.0170)               | 0.0205<br>(0.0145)        | -0.00485<br>(0.00874)  | -0.0135<br>(0.0140)              |
| Win                                                                          | -0.0181<br>(0.0197)              | -0.0225<br>(0.0168)       | -0.00192<br>(0.00855)  | -0.00391<br>(0.0198)             |
| Constant                                                                     | 0.505**<br>(0.0664)              | 0.388<br>(0.354)          | 0.500**<br>(0.0633)    | 0.502**<br>(0.0643)              |
| R squared                                                                    | 0.013                            | 0.134                     | 0.033                  | 0.018                            |
| R squared Adj.                                                               | .0076092                         | .1239723                  | .0319564               | .0168711                         |
| Degrees of freedom                                                           | 57                               | 57                        | 59                     | 59                               |
| F statistic                                                                  | 1.160                            | 3.379                     | 1.655                  | 0.859                            |
| Observations                                                                 | 1184                             | 1184                      | 11040                  | 4631                             |
